# Supplementary material for: Episodic Decrease in Temperature Increases mcy Gene Transcription and Cellular Microcystin in Continuous Cultures of Microcystis aeruginosa PCC 7806
Source: PubMed Central journal article supplement (PMC7744600; doi:10.3389/fmicb.2020.601864), 2020-12-03
Supplement: Data_Sheet_1.pdf [file Data_Sheet_1.pdf]

## Supplementary Material

### 1 Supplementary Figures and Tables

#### 1.1 Supplementary Figures

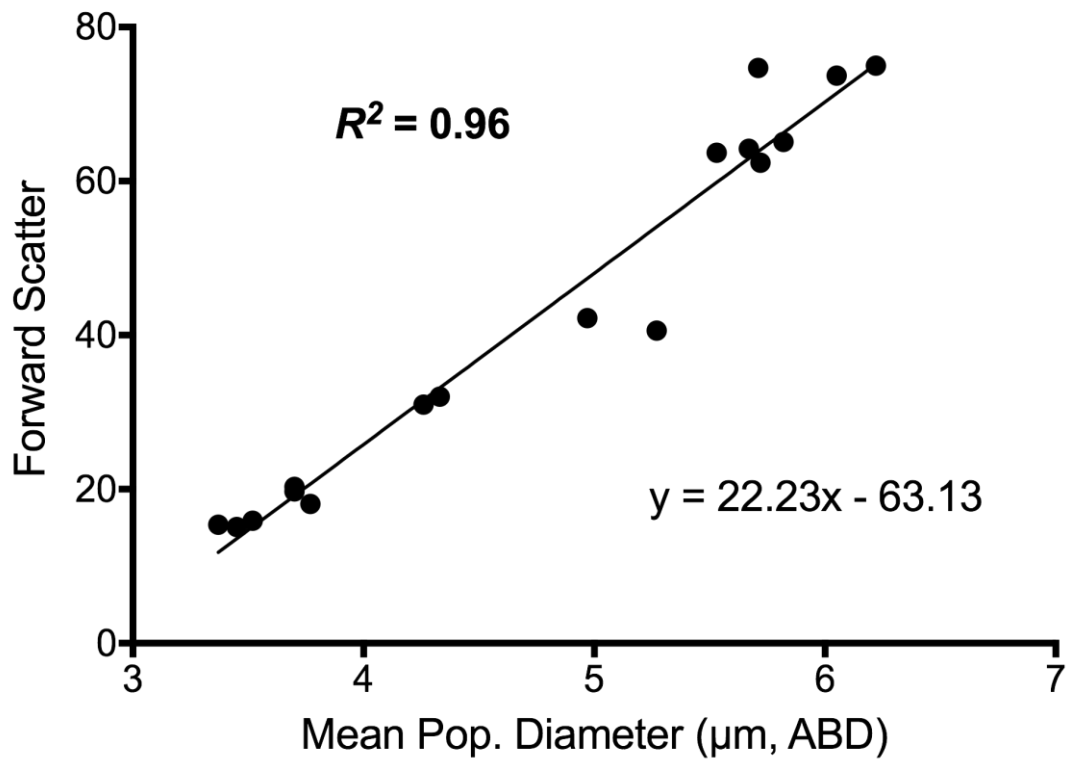

**Supplementary Figure 1.** Relationship between forward scatter (from flow cytometry using Guava easyCyteHT) and population mean diameter in cells of *M. aeruginosa*. Equation from linear regression.

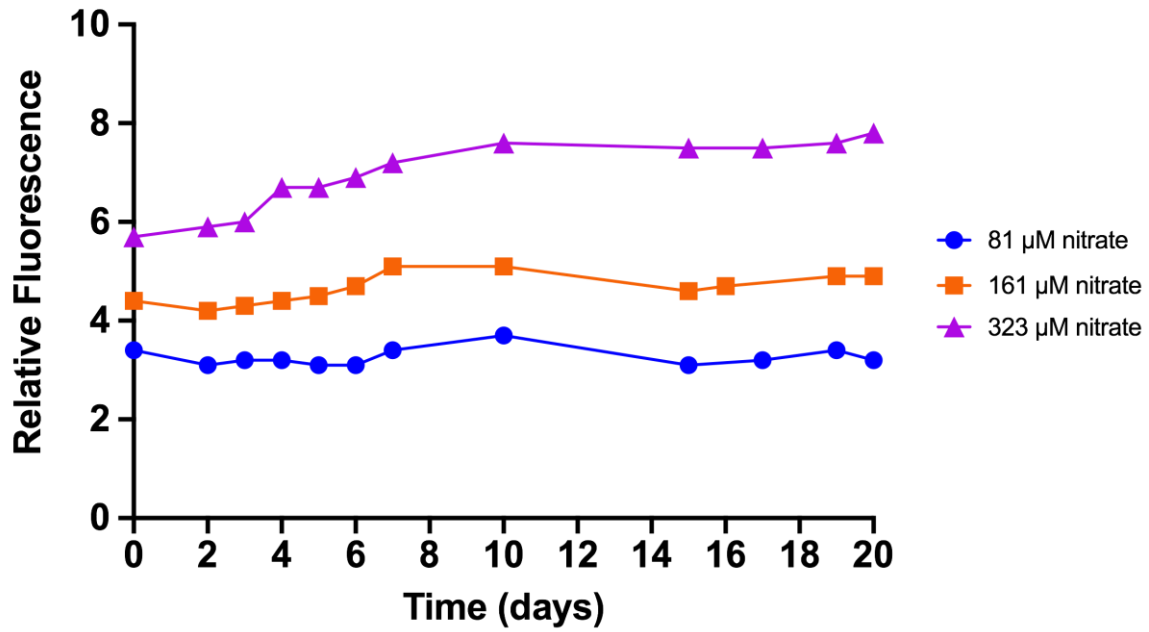

**Supplementary Figure 2.** Relative fluorescence of individual cells of *M. aeruginosa* PCC 7860 grown in different concentrations of nitrate over a 20-d period at steady state. Fluorescence was measured *via* flow cytometry.

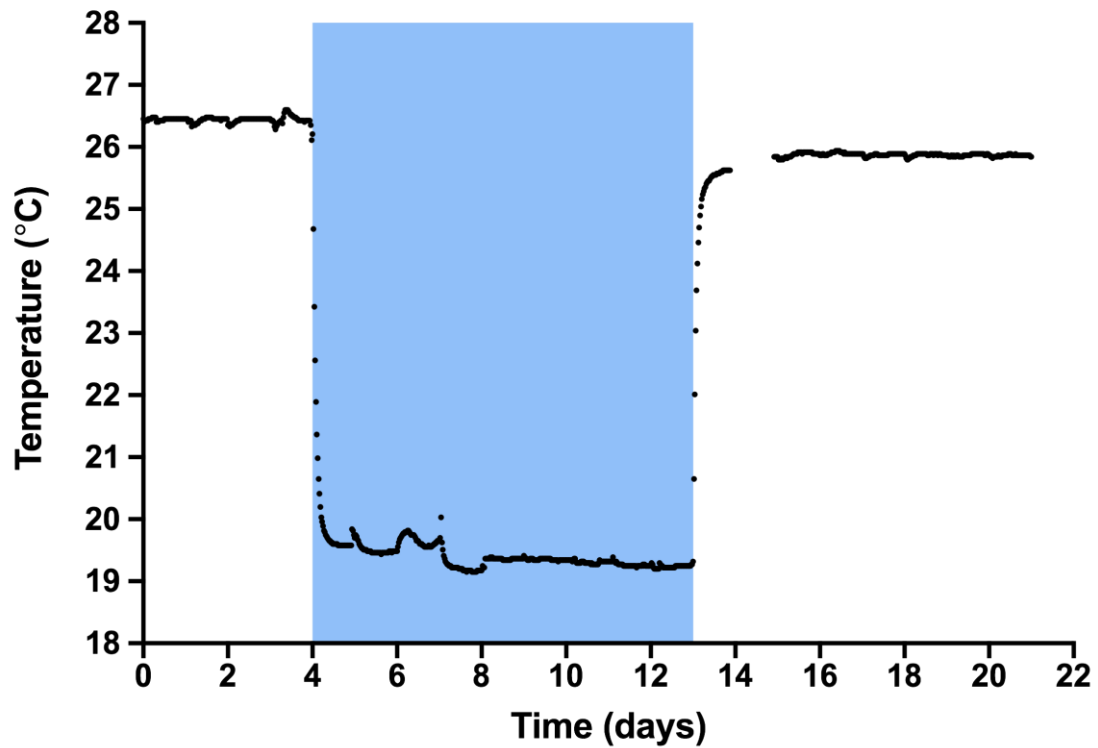

**Supplementary Figure 3.** Temperature of culture media during experimental period. Temperature was measured every 30 min and a point is plotted for each measurement. Temperature data logger malfunctioned for a 24.5 h period around day 14 which can be seen as an absence of data for that period.

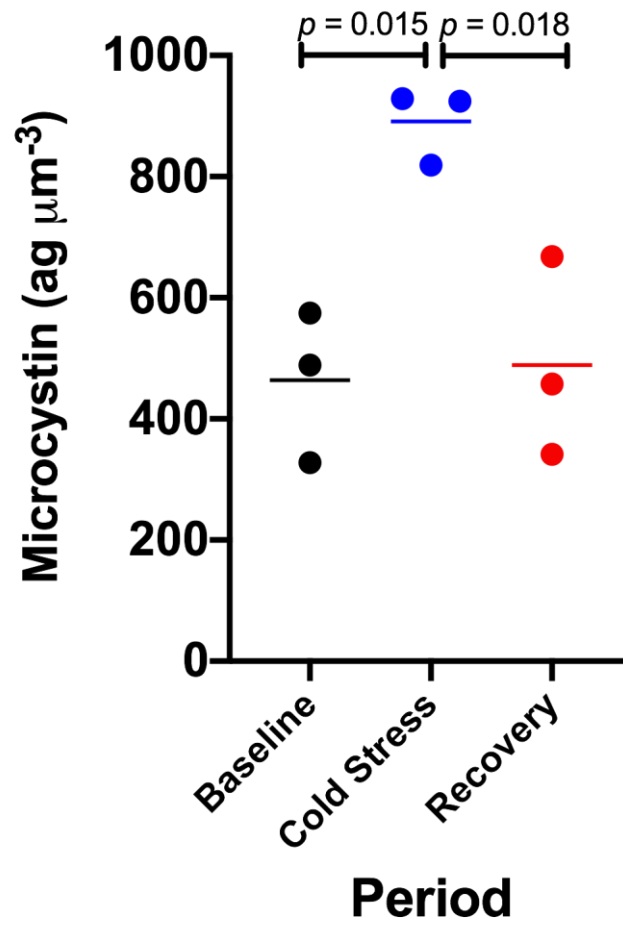

**Supplementary Figure 4.** Mean cellular microcystin content on the final day of each experimental temperature period. Reported  $p$ -values from RM-ANOVA.

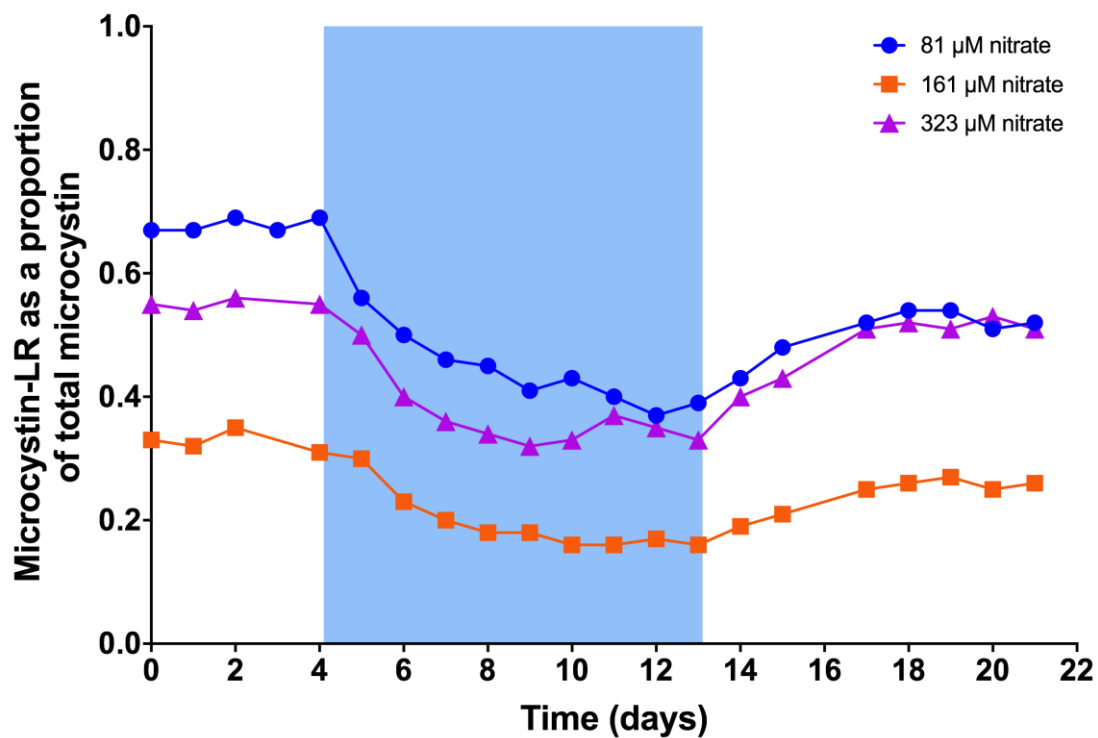

**Supplementary Figure 5.** Profile of detected microcystin congeners across experimental time. Two congeners were detected: microcystin-LR and [D-Asp<sup>3</sup>]-microcystin-LR. The figure illustrates microcystin-LR as a proportion of total microcystin.

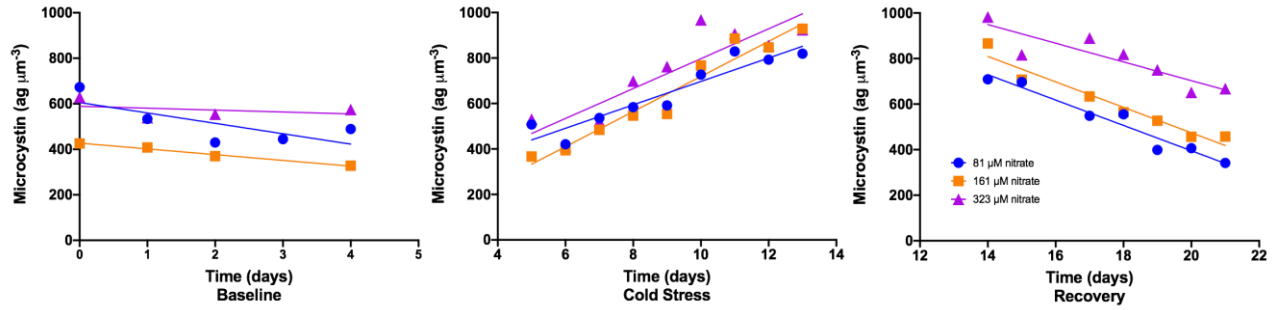

**Supplementary Figure 6A.** Relationship of cellular microcystin content to time for each temperature period: baseline, 26°C; cold stress, 19°C; recovery 26°C. Slopes for each N concentration:period combination was calculated by linear regression.

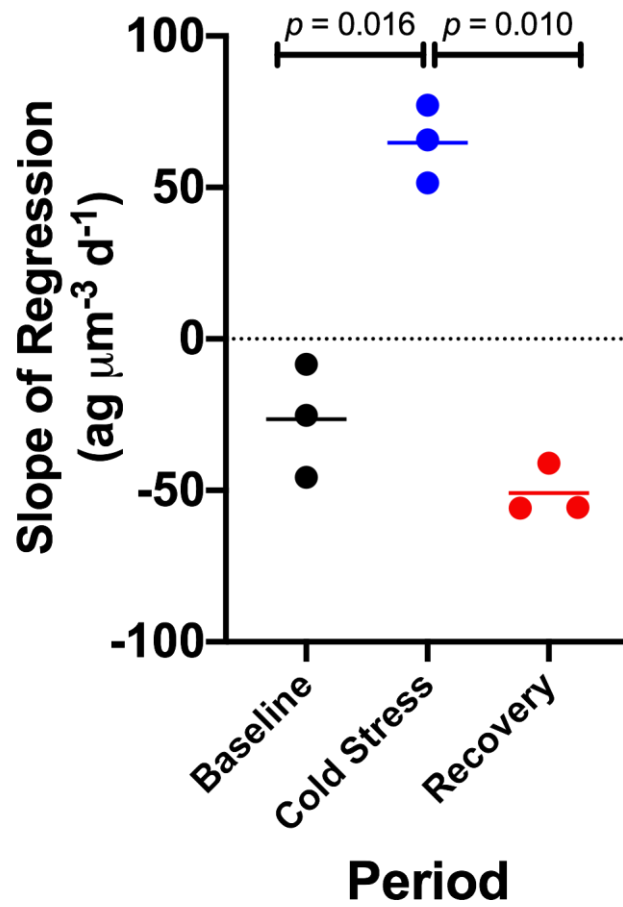

**Supplementary Figure 6B.** Relationship of cellular microcystin content to time for each temperature period: baseline, 26° C; cold stress, 19° C; recovery 26° C. Summary of slopes for each N concentration:period combination and RM-ANOVA results.

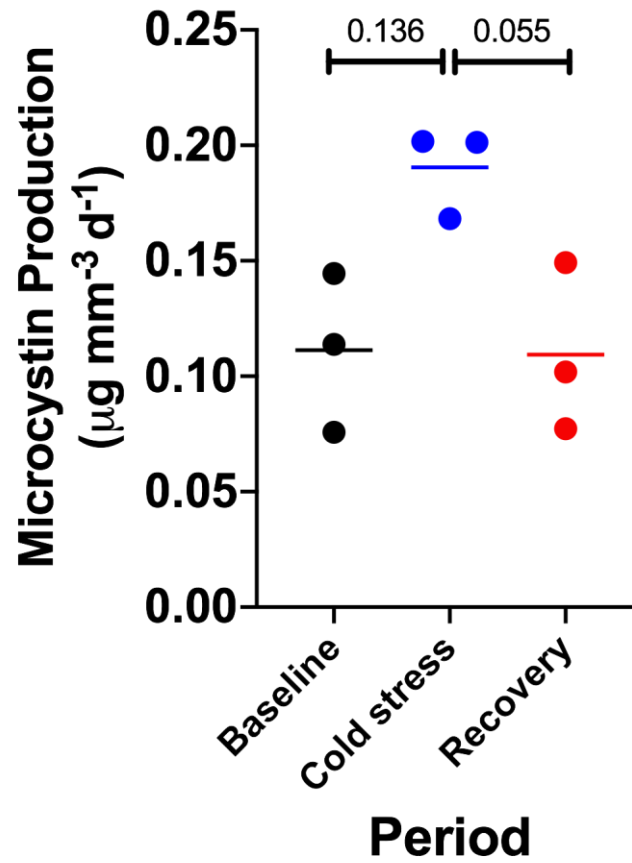

**Supplementary Figure 7.** Microcystin production per unit biovolume by experimental time period. Reported  $p$ -values from RM-ANOVA.



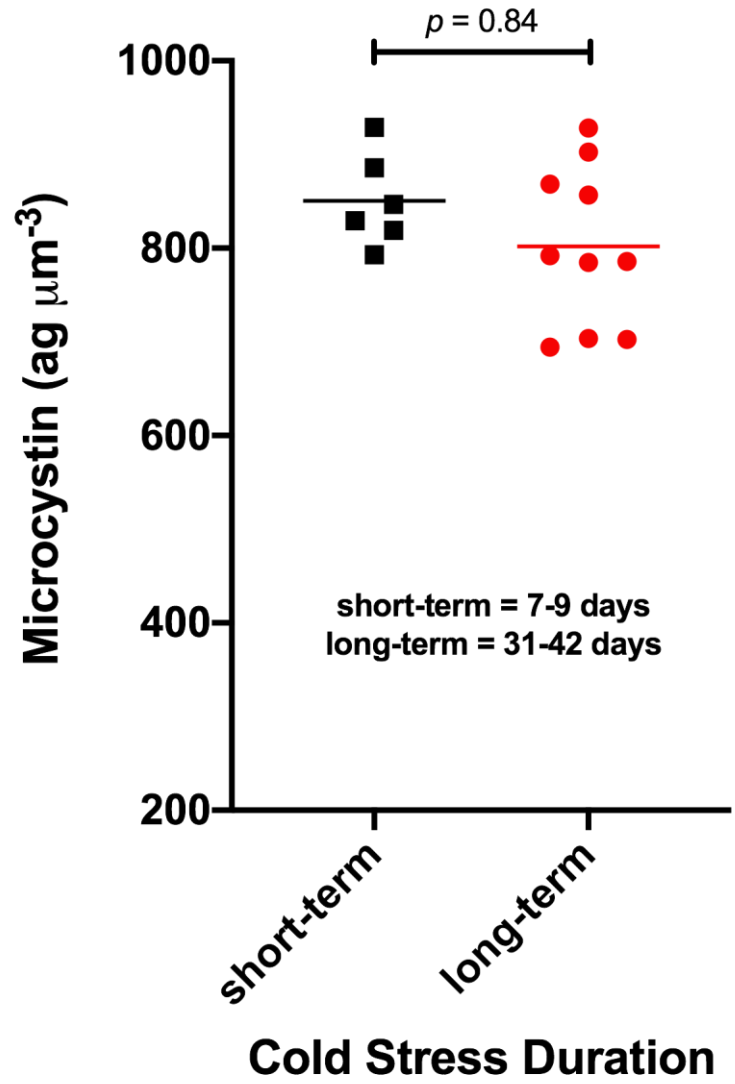

**Supplementary Figure 8.** Comparison of microcystin quota in *M. aeruginosa* PCC 7806 after short-term (7-9 days) vs. long-term (31-42 days) cold stress (19° C). Observations from cultures grown in 81 and 161  $\mu\text{M}$  nitrate are combined.

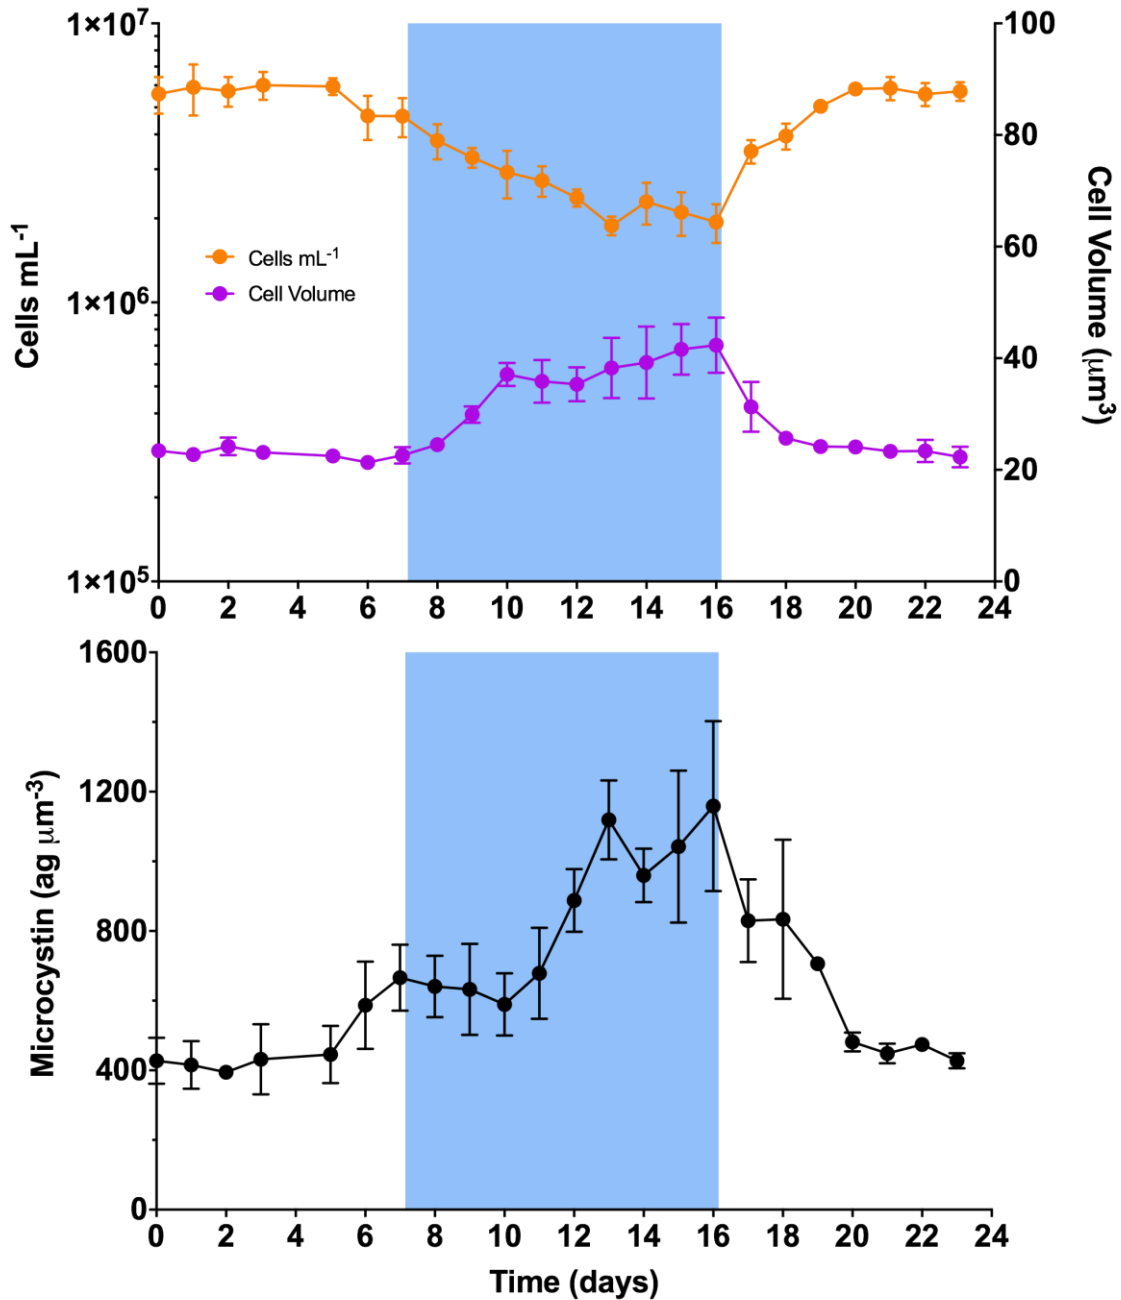

**Supplementary Figure 9.** Reproducibility of experimental results. (see text). Dynamics of cell concentration, cell volume, and microcystin quota in continuous cultures of *M. aeruginosa* PCC7806 over experimental time. Blue shading represents the time period when temperature was set to 19° C; other periods temperature was 26° C. All cultures grown in 161 μM nitrate. n = 3.

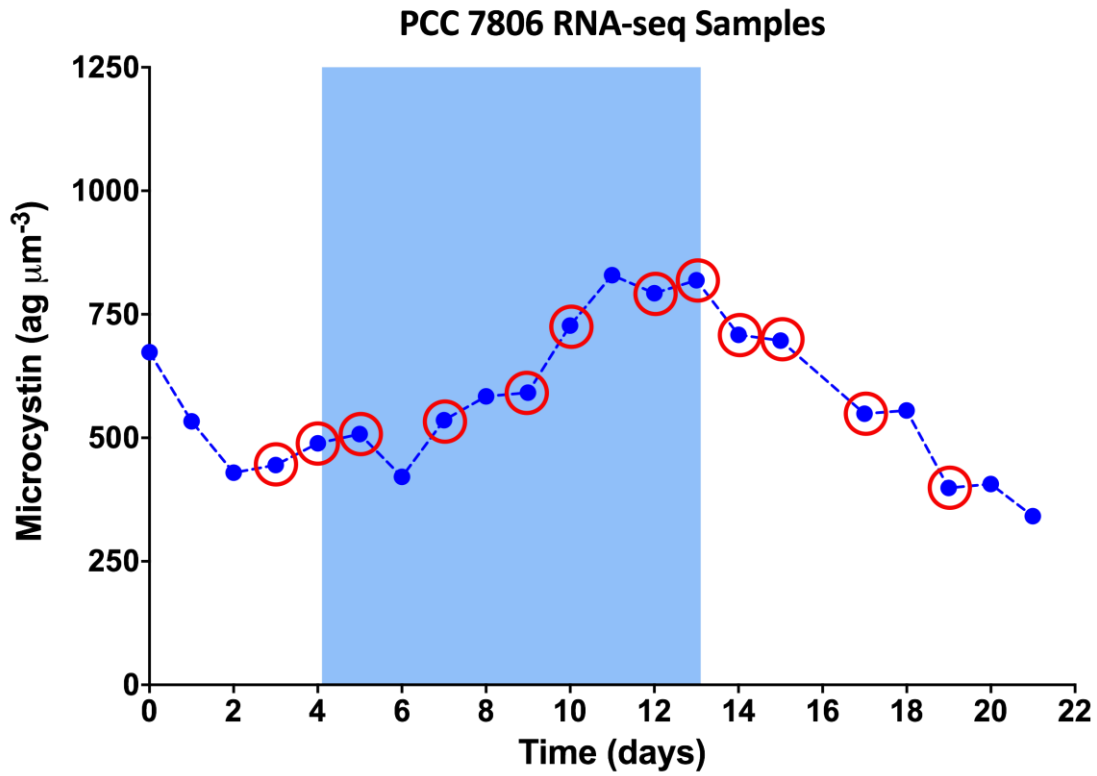

**Supplementary Figure 10.** Experimental time trace of *M. aeruginosa* PCC7806 growing in 81  $\mu\text{M}$  nitrate. Blue dots represent sampling points. Red circles indicate sample points for which RNA was sequenced.
