# Supplementary material for: Episodic Decrease in Temperature Increases mcy Gene Transcription and Cellular Microcystin in Continuous Cultures of Microcystis aeruginosa PCC 7806
Source: Front Microbiol. 2020 Dec 3;11:601864. doi: 10.3389/fmicb.2020.601864 (PMC7744600; doi:10.3389/fmicb.2020.601864)
Supplement: Supplementary file 3 [file Table_3.XLSX]

## Sheet: Module_13_fdr=0.05.txt
Supplemental Table 3. Enriched gene ontology terms derived from genes in combined modules 1 and 3.
This list contains all terms, including parent terms.
Enrichment	GO ID	GO Term	FDR p-value	GO Category
over	GO:0003735	structural constituent of ribosome	7.16849e-29	molecular function
over	GO:0005198	structural molecule activity	8.25205e-26	molecular function
over	GO:0003723	RNA binding	1.39536e-15	molecular function
over	GO:0019843	rRNA binding	3.55874e-15	molecular function
over	GO:0003824	catalytic activity	1.1475e-07	molecular function
over	GO:0036094	small molecule binding	5.08616e-06	molecular function
over	GO:0043168	anion binding	8.02211e-06	molecular function
over	GO:0016740	transferase activity	1.49892e-05	molecular function
over	GO:1901265	nucleoside phosphate binding	4.32954e-05	molecular function
over	GO:0000166	nucleotide binding	4.32954e-05	molecular function
over	GO:0035639	purine ribonucleoside triphosphate binding	4.32954e-05	molecular function
over	GO:0005488	binding	6.30282e-05	molecular function
over	GO:0043167	ion binding	0.000115146	molecular function
over	GO:0097367	carbohydrate derivative binding	0.000131533	molecular function
over	GO:0140098	catalytic activity, acting on RNA	0.000152632	molecular function
over	GO:0005524	ATP binding	0.000165534	molecular function
over	GO:0097159	organic cyclic compound binding	0.000218814	molecular function
over	GO:1901363	heterocyclic compound binding	0.000218814	molecular function
over	GO:0032553	ribonucleotide binding	0.000259555	molecular function
over	GO:0032555	purine ribonucleotide binding	0.000259555	molecular function
over	GO:0017076	purine nucleotide binding	0.00035116	molecular function
over	GO:0032559	adenyl ribonucleotide binding	0.000966379	molecular function
over	GO:0034062	5'-3' RNA polymerase activity	0.00100242	molecular function
over	GO:0097747	RNA polymerase activity	0.00100242	molecular function
over	GO:0003899	DNA-directed 5'-3' RNA polymerase activity	0.00100242	molecular function
over	GO:0016776	phosphotransferase activity, phosphate group as acceptor	0.00115934	molecular function
over	GO:0030554	adenyl nucleotide binding	0.00125873	molecular function
over	GO:0000049	tRNA binding	0.00157467	molecular function
over	GO:0140101	catalytic activity, acting on a tRNA	0.00510555	molecular function
over	GO:0017111	nucleoside-triphosphatase activity	0.00845004	molecular function
over	GO:0022857	transmembrane transporter activity	0.010348	molecular function
over	GO:0005215	transporter activity	0.010986	molecular function
over	GO:0016875	ligase activity, forming carbon-oxygen bonds	0.0143846	molecular function
over	GO:0004812	aminoacyl-tRNA ligase activity	0.0143846	molecular function
over	GO:0016887	ATPase activity	0.0166543	molecular function
over	GO:0005216	ion channel activity	0.019282	molecular function
over	GO:0016462	pyrophosphatase activity	0.0250163	molecular function
over	GO:0016817	hydrolase activity, acting on acid anhydrides	0.0254807	molecular function
over	GO:0016818	hydrolase activity, acting on acid anhydrides, in phosphorus-containing anhydrides	0.0254807	molecular function
over	GO:0022804	active transmembrane transporter activity	0.0307871	molecular function
over	GO:0005261	cation channel activity	0.0333375	molecular function
over	GO:0022803	passive transmembrane transporter activity	0.0397411	molecular function
over	GO:0015267	channel activity	0.0397411	molecular function
over	GO:0015450	P-P-bond-hydrolysis-driven protein transmembrane transporter activity	0.0474322	molecular function
under	GO:0004803	transposase activity	0.0102295	molecular function
under	GO:0140097	catalytic activity, acting on DNA	0.0254807	molecular function
over	GO:0006412	translation	2.60867e-24	biological process
over	GO:0043043	peptide biosynthetic process	5.58943e-24	biological process
over	GO:0006518	peptide metabolic process	6.37939e-23	biological process
over	GO:0043604	amide biosynthetic process	1.97036e-21	biological process
over	GO:0043603	cellular amide metabolic process	1.62006e-19	biological process
over	GO:1901566	organonitrogen compound biosynthetic process	2.75092e-19	biological process
over	GO:0010467	gene expression	1.6057e-17	biological process
over	GO:0044271	cellular nitrogen compound biosynthetic process	2.67801e-17	biological process
over	GO:0044249	cellular biosynthetic process	6.9168e-17	biological process
over	GO:1901576	organic substance biosynthetic process	6.00893e-16	biological process
over	GO:1901564	organonitrogen compound metabolic process	1.58059e-15	biological process
over	GO:0009058	biosynthetic process	2.80195e-15	biological process
over	GO:0034645	cellular macromolecule biosynthetic process	7.92705e-15	biological process
over	GO:0009059	macromolecule biosynthetic process	5.11296e-14	biological process
over	GO:0019538	protein metabolic process	1.30764e-11	biological process
over	GO:0044267	cellular protein metabolic process	3.23396e-11	biological process
over	GO:0009987	cellular process	1.46357e-09	biological process
over	GO:0071704	organic substance metabolic process	6.07618e-09	biological process
over	GO:0006807	nitrogen compound metabolic process	7.96458e-09	biological process
over	GO:0044238	primary metabolic process	2.69666e-08	biological process
over	GO:0008152	metabolic process	3.233e-07	biological process
over	GO:0034641	cellular nitrogen compound metabolic process	6.81264e-07	biological process
over	GO:0044237	cellular metabolic process	4.08877e-06	biological process
over	GO:0071840	cellular component organization or biogenesis	5.19132e-05	biological process
over	GO:0044281	small molecule metabolic process	6.30282e-05	biological process
over	GO:0006399	tRNA metabolic process	0.000249309	biological process
over	GO:0034660	ncRNA metabolic process	0.000259555	biological process
over	GO:0043170	macromolecule metabolic process	0.000348547	biological process
over	GO:0072522	purine-containing compound biosynthetic process	0.000393666	biological process
over	GO:1901137	carbohydrate derivative biosynthetic process	0.000488755	biological process
over	GO:0006164	purine nucleotide biosynthetic process	0.000566431	biological process
over	GO:0044260	cellular macromolecule metabolic process	0.000566431	biological process
over	GO:0009152	purine ribonucleotide biosynthetic process	0.00126023	biological process
over	GO:1901293	nucleoside phosphate biosynthetic process	0.0016474	biological process
over	GO:0009165	nucleotide biosynthetic process	0.0016474	biological process
over	GO:0044085	cellular component biogenesis	0.0019043	biological process
over	GO:0046390	ribose phosphate biosynthetic process	0.0019043	biological process
over	GO:0016043	cellular component organization	0.00288139	biological process
over	GO:0009260	ribonucleotide biosynthetic process	0.00348895	biological process
over	GO:1901135	carbohydrate derivative metabolic process	0.00355189	biological process
over	GO:0016070	RNA metabolic process	0.00493458	biological process
over	GO:0072521	purine-containing compound metabolic process	0.00845004	biological process
over	GO:0055086	nucleobase-containing small molecule metabolic process	0.00950611	biological process
over	GO:0090407	organophosphate biosynthetic process	0.00965561	biological process
over	GO:0006418	tRNA aminoacylation for protein translation	0.00965561	biological process
over	GO:0006520	cellular amino acid metabolic process	0.00965561	biological process
over	GO:0043039	tRNA aminoacylation	0.00965561	biological process
over	GO:0043038	amino acid activation	0.00965561	biological process
over	GO:0006163	purine nucleotide metabolic process	0.0110266	biological process
over	GO:0006082	organic acid metabolic process	0.0127359	biological process
over	GO:0043933	protein-containing complex subunit organization	0.0132503	biological process
over	GO:0006396	RNA processing	0.0133916	biological process
over	GO:0019693	ribose phosphate metabolic process	0.0140887	biological process
over	GO:0043436	oxoacid metabolic process	0.0151073	biological process
over	GO:1901362	organic cyclic compound biosynthetic process	0.0153725	biological process
over	GO:0018130	heterocycle biosynthetic process	0.0166543	biological process
over	GO:0019438	aromatic compound biosynthetic process	0.0175177	biological process
over	GO:0009150	purine ribonucleotide metabolic process	0.0175177	biological process
over	GO:0009259	ribonucleotide metabolic process	0.0217368	biological process
over	GO:0042254	ribosome biogenesis	0.0225187	biological process
over	GO:0022613	ribonucleoprotein complex biogenesis	0.0225187	biological process
over	GO:0006811	ion transport	0.0225187	biological process
over	GO:0019752	carboxylic acid metabolic process	0.0225187	biological process
over	GO:0034654	nucleobase-containing compound biosynthetic process	0.0230666	biological process
over	GO:0051179	localization	0.023696	biological process
over	GO:0009201	ribonucleoside triphosphate biosynthetic process	0.0253803	biological process
over	GO:0009199	ribonucleoside triphosphate metabolic process	0.0253803	biological process
over	GO:0009206	purine ribonucleoside triphosphate biosynthetic process	0.0333375	biological process
over	GO:0009205	purine ribonucleoside triphosphate metabolic process	0.0333375	biological process
over	GO:0009145	purine nucleoside triphosphate biosynthetic process	0.0333375	biological process
over	GO:0051234	establishment of localization	0.0359687	biological process
over	GO:1901606	alpha-amino acid catabolic process	0.0433152	biological process
over	GO:0006810	transport	0.0459322	biological process
over	GO:0034470	ncRNA processing	0.0460323	biological process
over	GO:0043244	regulation of protein-containing complex disassembly	0.0474322	biological process
over	GO:0043952	protein transport by the Sec complex	0.0474322	biological process
over	GO:0009142	nucleoside triphosphate biosynthetic process	0.0474322	biological process
under	GO:0006310	DNA recombination	0.0016474	biological process
under	GO:0006313	transposition, DNA-mediated	0.0102295	biological process
under	GO:0032196	transposition	0.0102295	biological process
over	GO:0005840	ribosome	1.33984e-30	cellular component
over	GO:0043226	organelle	3.79105e-26	cellular component
over	GO:0043232	intracellular non-membrane-bounded organelle	5.27025e-26	cellular component
over	GO:0043229	intracellular organelle	8.25205e-26	cellular component
over	GO:0043228	non-membrane-bounded organelle	8.73725e-26	cellular component
over	GO:0005622	intracellular	2.37121e-18	cellular component
over	GO:0110165	cellular anatomical entity	2.00776e-10	cellular component
over	GO:0044391	ribosomal subunit	2.04455e-07	cellular component
over	GO:1990904	ribonucleoprotein complex	9.47093e-07	cellular component
over	GO:0005737	cytoplasm	9.31372e-06	cellular component
over	GO:0015934	large ribosomal subunit	6.65077e-05	cellular component
over	GO:0022626	cytosolic ribosome	0.0140887	cellular component
over	GO:0033178	proton-transporting two-sector ATPase complex, catalytic domain	0.0140887	cellular component
over	GO:0045261	proton-transporting ATP synthase complex, catalytic core F(1)	0.0140887	cellular component
over	GO:0015935	small ribosomal subunit	0.0151073	cellular component
